# Supplementary material
Source: publisher site journal article supplement (https://bdj.pensoft.net/lib/ajax_srv/article_elements_srv.php?action=download_suppl_file&instance_id=3309655)
Supplement: Supplementary file 1 [file article_elements_srv.php]

proc sql;
create table dir2.inpt_&yr. as
  select distinct a.id||a.id_birthday||a.hosp_id||a.in_date as key1,
         a.id||a.id_birthday as key2, 
         a.fee_ym||a.appl_type||a.hosp_id||a.appl_date||a.case_type||a.seq_no as key3,
		 a.id_birthday, a.tran_code,   
         input(a.med_amt, 8.) as med_amt2, a.id_sex as sex,
         case 
            when a.tran_code in ('4','A') then 1
            else 0
         end as die,
		 mdy(input(substr(a.id_birthday,5,2),2.),
		     input(substr(a.id_birthday,7,2),2.),
			 input(substr(a.id_birthday,1,4),4.)) as dob,
		 mdy(input(substr(a.in_date,5,2),2.),
		     input(substr(a.in_date,7,2),2.),
			 input(substr(a.in_date,1,4),4.)) as d_in,
		 mdy(input(substr(a.out_date,5,2),2.),
		     input(substr(a.out_date,7,2),2.),
			 input(substr(a.out_date,1,4),4.)) as d_out,
		 (calculated d_in - calculated dob)/365.24 as age,
    upcase(strip(a.icd9cm_code)) as idx1a,
    upcase(strip(a.icd9cm_code_1)) as idx2a,
    upcase(strip(a.icd9cm_code_2)) as idx3a,
    upcase(strip(a.icd9cm_code_3)) as idx4a,
    upcase(strip(a.icd9cm_code_4)) as idx5a,
	input(calculated idx1a,3.) as idx1,
	input(calculated idx2a,3.) as idx2,
	input(calculated idx3a,3.) as idx3,
	input(calculated idx4a,3.) as idx4,
	input(calculated idx5a,3.) as idx5,
	(((calculated d_in - b.d_opd_x<2 and
        b.d_opd_x^=.) or
       (calculated d_in - b.d_opd <2 and
        b.d_opd_x=. and b.d_opd^=.)
        ) or
        calculated idx1a in &ild1 or 
		calculated idx2a in &ild1 or 
		calculated idx3a in &ild1 or 
	    calculated idx4a in &ild1 or 
	    calculated idx5a in &ild1 or
        calculated idx1a in &ild2 or 
		calculated idx2a in &ild2 or 
		calculated idx3a in &ild2 or 
	    calculated idx4a in &ild2 or 
	    calculated idx5a in &ild2) as ili2,
/*  Inpt within outpt=ILI =<1 days or Inpt=ILI */
/*  d_opd: opd date ; d_opd_x: opd end date */
	(calculated idx1 = &asth or
	 calculated idx2 = &asth or
	 calculated idx3 = &asth or
	 calculated idx4 = &asth or
	 calculated idx5 = &asth) as asth,
	(calculated idx1 = &allrh or
	 calculated idx2 = &allrh or
	 calculated idx3 = &allrh or
	 calculated idx4 = &allrh or
	 calculated idx5 = &allrh) as allrh,
	(calculated idx1 = &atopd or
	 calculated idx2 = &atopd or
	 calculated idx3 = &atopd or
	 calculated idx4 = &atopd or
	 calculated idx5 = &atopd) as atopd,
	(calculated idx1 between &cong or
	 calculated idx2 between &cong or
	 calculated idx3 between &cong or
	 calculated idx4 between &cong or
	 calculated idx5 between &cong) as cong,
	(calculated idx1 between &tb or
	 calculated idx2 between &tb or
	 calculated idx3 between &tb or
	 calculated idx4 between &tb or
	 calculated idx5 between &tb) as tb,
	(calculated idx1 between &cancer or
	 calculated idx2 between &cancer or
	 calculated idx3 between &cancer or
	 calculated idx4 between &cancer or
	 calculated idx5 between &cancer) as cancer,	 
	(calculated idx1 between &dm or
	 calculated idx2 between &dm or
	 calculated idx3 between &dm or
	 calculated idx4 between &dm or
	 calculated idx5 between &dm) as dm,
	(calculated idx1 = &hlipid or
	 calculated idx2 = &hlipid or
	 calculated idx3 = &hlipid or
	 calculated idx4 = &hlipid or
	 calculated idx5 = &hlipid) as hlipid,
	(calculated idx1 between &thyr or
	 calculated idx2 between &thyr or
	 calculated idx3 between &thyr or
	 calculated idx4 between &thyr or
	 calculated idx5 between &thyr) as thyr,
	(calculated idx1 = &chf or
	 calculated idx2 = &chf or
	 calculated idx3 = &chf or
	 calculated idx4 = &chf or
	 calculated idx5 = &chf) as chf,
	(calculated idx1 between &vhd or
	 calculated idx2 between &vhd or
	 calculated idx3 between &vhd or
	 calculated idx4 between &vhd or
	 calculated idx5 between &vhd) as vhd,
	(calculated idx1 between &cad or
	 calculated idx2 between &cad or
	 calculated idx3 between &cad or
	 calculated idx4 between &cad or
	 calculated idx5 between &cad) as cad,
	(calculated idx1 = &rhy or
	 calculated idx2 = &rhy or
	 calculated idx3 = &rhy or
	 calculated idx4 = &rhy or
	 calculated idx5 = &rhy) as rhy,
	(calculated cad = 1 or
     calculated vhd = 1 or
     calculated chf = 1 or
	 calculated rhy = 1) as heart,
	(calculated idx1 between &htn or
	 calculated idx2 between &htn or
	 calculated idx3 between &htn or
	 calculated idx4 between &htn or
	 calculated idx5 between &htn) as htn,
	(calculated idx1 between &cva or
	 calculated idx2 between &cva or
	 calculated idx3 between &cva or
	 calculated idx4 between &cva or
	 calculated idx5 between &cva) as cva,
 	(calculated idx1 between &demen or
 	 calculated idx2 between &demen or
 	 calculated idx3 between &demen or
 	 calculated idx4 between &demen or
 	 calculated idx5 between &demen or
	 calculated idx1 = &park or
	 calculated idx2 = &park or
	 calculated idx3 = &park or
	 calculated idx4 = &park or
	 calculated idx5 = &park) as demen,
 	(calculated idx1 = &epil or
 	 calculated idx2 = &epil or
 	 calculated idx3 = &epil or
 	 calculated idx4 = &epil or
 	 calculated idx5 = &epil) as epil,
	(calculated idx1 between &paod or
	 calculated idx2 between &paod or
	 calculated idx3 between &paod or
	 calculated idx4 between &paod or
	 calculated idx5 between &paod) as paod,
	(calculated idx1 in &copd or
	 calculated idx2 in &copd or
	 calculated idx3 in &copd or
	 calculated idx4 in &copd or
	 calculated idx5 in &copd) as copd,
	(calculated idx1 between &pulcer or
	 calculated idx2 between &pulcer or
	 calculated idx3 between &pulcer or
	 calculated idx4 between &pulcer or
	 calculated idx5 between &pulcer) as pulcer,
	(calculated idx1 = &vhepa or
	 calculated idx2 = &vhepa or
	 calculated idx3 = &vhepa or
	 calculated idx4 = &vhepa or
	 calculated idx5 = &vhepa) as vhepa,
	(calculated idx1 = &cirr or
	 calculated idx2 = &cirr or
	 calculated idx3 = &cirr or
	 calculated idx4 = &cirr or
	 calculated idx5 = &cirr) as cirr,
	(calculated idx1 = &hcc or
	 calculated idx2 = &hcc or
	 calculated idx3 = &hcc or
	 calculated idx4 = &hcc or
	 calculated idx5 = &hcc) as hcc,	 
	(calculated idx1 between &renal or
	 calculated idx2 between &renal or
	 calculated idx3 between &renal or
	 calculated idx4 between &renal or
	 calculated idx5 between &renal) as renal,
    (calculated idx1 = &esrd or
	 calculated idx2 = &esrd or
	 calculated idx3 = &esrd or
	 calculated idx4 = &esrd or
	 calculated idx5 = &esrd) as esrd,
	(calculated idx1 between &preg or
	 calculated idx2 between &preg or
	 calculated idx3 between &preg or
	 calculated idx4 between &preg or
	 calculated idx5 between &preg) as preg,
	(calculated idx1 = &gout or
	 calculated idx2 = &gout or
	 calculated idx3 = &gout or
	 calculated idx4 = &gout or
	 calculated idx5 = &gout) as gout,
	(calculated idx1 = &flu or
	 calculated idx2 = &flu or
	 calculated idx3 = &flu or
	 calculated idx4 = &flu or
	 calculated idx5 = &flu) as flu,
	(substr(calculated idx1a,1,4) in &transplant or
	 substr(calculated idx2a,1,4) in &transplant or
	 substr(calculated idx3a,1,4) in &transplant or
	 substr(calculated idx4a,1,4) in &transplant or
	 substr(calculated idx5a,1,4) in &transplant or
     substr(calculated idx1a,1,3) in &transplant or
	 substr(calculated idx2a,1,3) in &transplant or
	 substr(calculated idx3a,1,3) in &transplant or
	 substr(calculated idx4a,1,3) in &transplant or
	 substr(calculated idx5a,1,3) in &transplant) as transplant,
	(substr(calculated idx1a,1,3) in &hiv or
	 substr(calculated idx2a,1,3) in &hiv or
	 substr(calculated idx3a,1,3) in &hiv or
	 substr(calculated idx4a,1,3) in &hiv or
	 substr(calculated idx5a,1,3) in &hiv) as hiv,
	(calculated idx1 = &sle or
	 calculated idx2 = &sle or
	 calculated idx3 = &sle or
	 calculated idx4 = &sle or
	 calculated idx5 = &sle) as sle,
	(calculated idx1 = &rha or
	 calculated idx2 = &rha or
	 calculated idx3 = &rha or
	 calculated idx4 = &rha or
	 calculated idx5 = &rha) as rha,
	(calculated idx1 = &aks or
	 calculated idx2 = &aks or
	 calculated idx3 = &aks or
	 calculated idx4 = &aks or
	 calculated idx5 = &aks) as aks
  from dir.dd_mp_&yr. as a, dir2.outpt_&yr. as b
  where calculated key2=b.key2;
/* count by tx (inpt) & encounter (outpt) */

create table dir2.inpt_ili_v_&yr. as
  select distinct 
   key1, key2, dob, d_in, d_out,
   age, med_amt2, sex, die,
   idx1, idx2, idx3, idx4, idx5,
   idx1a, idx2a, idx3a, idx4a, idx5a,
   ili2, &comorbid
  from dir2.inpt_&yr.
  where ili2=1;
/* count by encounter */

create table dir2.inpt_detail_&yr. as
   select distinct fee_ym||appl_type||hosp_id||appl_date||case_type||seq_no as key3,
        order_code,
	   (substr(strip(order_code),1,5) in &icu) as icu
   from dir.do_mp_&yr.;
/* count by tx */
   
create table dir2.inpt_icu_&yr._tx as
   select distinct b.icu, a.*
   from dir2.inpt_&yr. as a, dir2.inpt_detail_&yr. as b
   where a.key3 = b.key3; 
/* count by tx */

create table dir2.inpt_icu_&yr. as
   select distinct icu, key1, key2,
              sex, ili2, age, dob, d_in, d_out, 
              sum(med_amt2) as cost, 
              &mcomorbid_i,
              die as die_i,
              case
                when d_out - d_in < 366 and 
                     d_out - d_in > 0 then d_out - d_in
                when d_out - d_in > 365 then 365
                else .
              end as los
   from dir2.inpt_icu_&yr._tx
   where d_out^=.
   group by key1;
/* count by encounter */

create table dir2.inpt_outpt_ili_&yr. as
   select distinct a.icu, a.key1, 
            a.dob, 
            a.los, 
            a.cost, 
            a.sex,
            a.age,
            a.asth_i or b.asth_ as asth2,
            a.allrh_i or b.allrh_ as allrh2,
            a.atopd_i or b.atopd_ as atopd2,
            a.cong_i or b.cong_ as cong2,
			a.tb_i or b.tb_ as tb2, 
			a.cancer_i or b.cancer_ as cancer2,
			a.dm_i or b.dm_ as dm2,
			a.thyr_i or b.thyr_ as thyr2, 
			a.hlipid_i or b.hlipid_ as hlipid2,
			a.chf_i or b.chf_ as chf2, 
			a.vhd_i or b.vhd_ as vhd2,
			a.cad_i or b.cad_ as cad2,
			a.rhy_i or b.rhy_ as rhy2, 
			a.heart_i or b.heart_ as heart2, 
			a.htn_i or b.htn_ as htn2, 
			a.cva_i or b.cva_ as cva2, 
			a.demen_i or b.demen_ as demen2, 
			a.epil_i or b.epil_ as epil2, 
			a.paod_i or b.paod_ as paod2, 
			a.copd_i or b.copd_ as copd2,
			a.pulcer_i or b.pulcer_ as pulcer2,
			a.vhepa_i or b.vhepa_ as vhepa2, 
			a.cirr_i or b.cirr_ as cirr2,
			a.hcc_i or b.hcc_ as hcc2,
			a.renal_i or b.renal_ as renal2, 
			a.esrd_i or b.esrd_ as esrd2,
			a.preg_i or b.preg_ as preg2,
			a.gout_i or b.gout_ as gout2, 
			a.flu_i or b.flu_ as flu2,
			a.transplant_i or b.transplant_ as transplant2,
			a.hiv_i or b.hiv_ as hiv2,
			a.sle_i or b.sle_ as sle2,
			a.rha_i or b.rha_ as rha2,
			a.aks_i or b.aks_ as aks2,
			a.die_i as die2
   from dir2.inpt_icu_&yr. as a, dir2.outpt_dx_&yr. as b
   where a.key2 = b.key2 and a.ili2=1;
/* count by encounter */
quit;
run;
